# Supplementary material
Source: PubMed Central journal article supplement (PMC7980380)
Supplement: pnas.2015786118.sapp.pdf [file pnas.2015786118.sapp.pdf]

# Supplementary Information for

## Zn<sup>2+</sup> influx activates ERK and Akt signaling pathways

Kelsie J. Anson, Giulia A. Corbet, and Amy E. Palmer

**This PDF file includes:**

Figs. S1 to S10

Tables S1 to S3

Captions for Supplementary Movies S1&2 and Supplementary Movies S3&4

Supplemental Methods (Adenovirus Generation and RNA FISH)

SI References

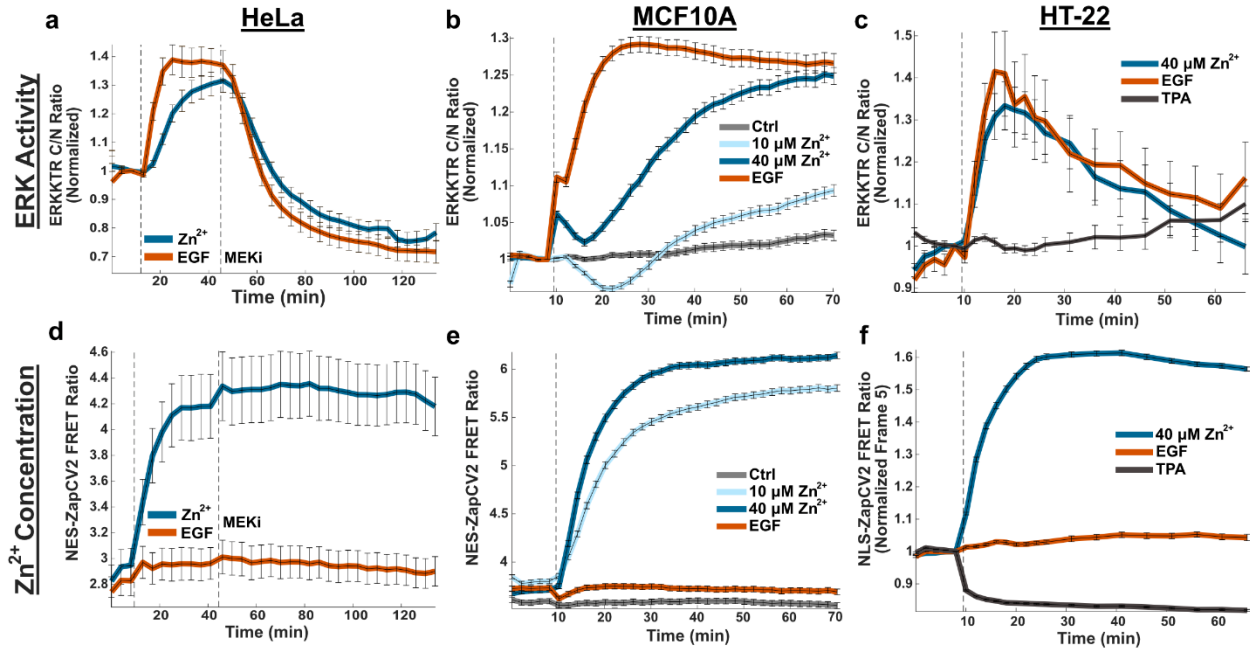

**Supplemental Fig S1:** Extracellular Zn<sup>2+</sup> leads to rapid cytosolic Zn<sup>2+</sup> influx and ERK activation in multiple cell types. A) Activation of ERK by Zn<sup>2+</sup> or EGF in HeLa cells showing the normalized mean and SD of at least 38 cells (from Fig 6c). B) Activation of ERK by Zn<sup>2+</sup> or EGF in MCF10A mammary epithelial cells showing the normalized mean and SD of at least 200 cells. C) Activation of ERK by Zn<sup>2+</sup> or EGF compared to Zn<sup>2+</sup>-deficient control in HT-22 mouse hippocampal neuronal cell line showing the normalized mean of at least 19 cells. D-E) Cytosolic Zn<sup>2+</sup> as shown by NES-ZapCV2 in the same cells as above upon stimulation by extracellular Zn<sup>2+</sup> and EGF. Results show that treatment with EGF and changing the media (Ctrl in middle panel) do not lead to changes in cytosolic Zn<sup>2+</sup>.

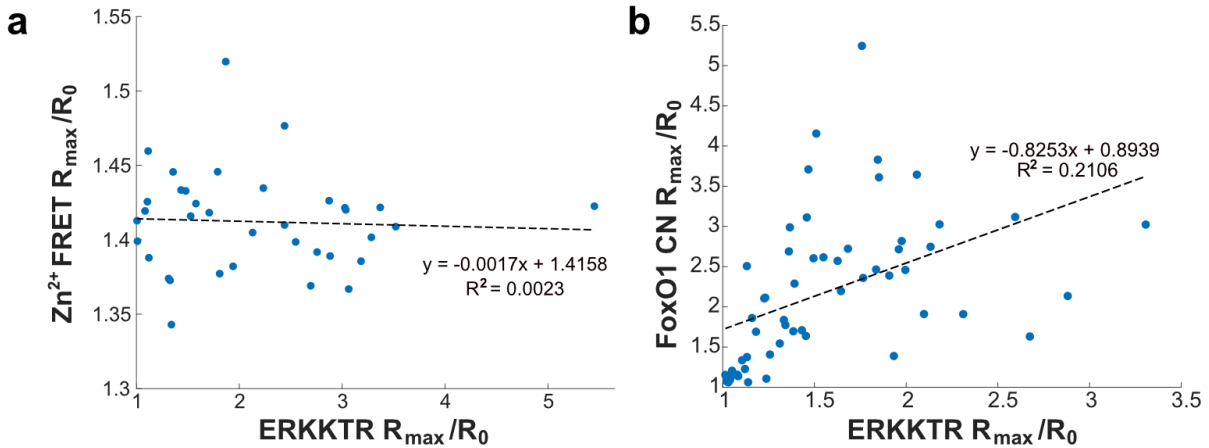

**Supplemental Fig S2:** Comparison of cell variability in response to  $\text{Zn}^{2+}$  stimulation. A) Variability in  $\text{Zn}^{2+}$  signal as a function of variability in ERK signal. The FRET ratio  $R_{\text{max}}/R_0$  for the ZapCV2 sensor (representative of  $\text{Zn}^{2+}$  levels) for each HeLa cell is plotted as a function of the ERK KTR  $R_{\text{max}}/R_0$  signal, where  $R_0$  represents the initial ratio for each sensor. There is no correlation between the variability in the two signals. B) Variability in Akt signal from the FoxO1-Clover translocation sensor as a function of variability in ERK signal upon  $40 \mu\text{M}$   $\text{Zn}^{2+}$  addition. The Akt sensor  $R_{\text{max}}/R_0$  for each HeLa cell is plotted as a function of the ERK KTR  $R_{\text{max}}/R_0$  signal, where  $R_0$  represents the initial ratio for each sensor.

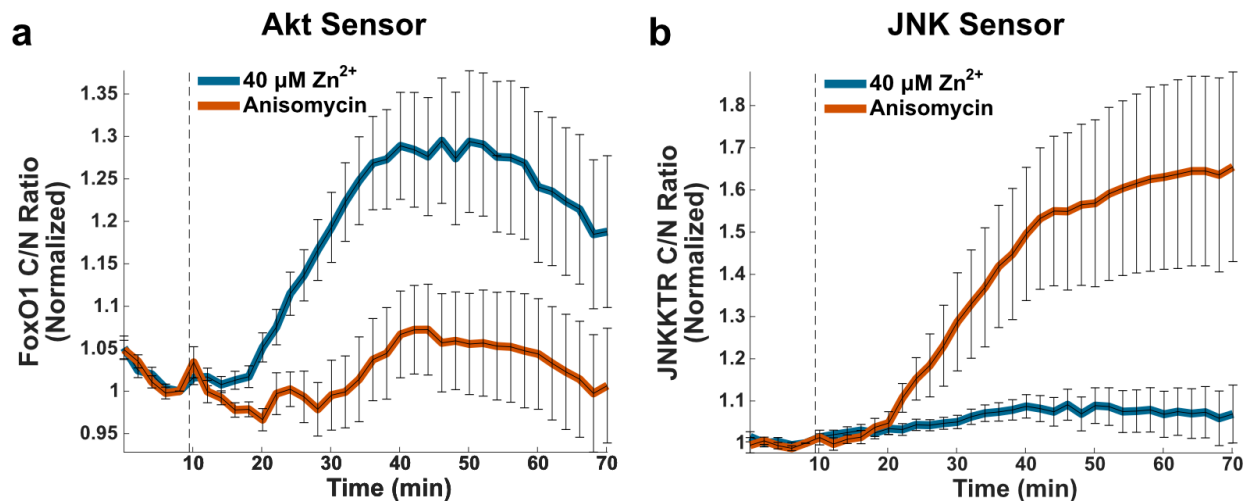

**Supplemental Fig S3:** Zn<sup>2+</sup> does not activate JNK. Akt (a) or JNK (b) translocation sensors upon stimulation with either 40 μM Zn<sup>2+</sup> or 100 ng/mL Anisomycin at the time indicated by dashed line (~ 10 minutes). The normalized mean and SD from at least 10 cells are plotted against time. Traces are representative of three separate experiments.

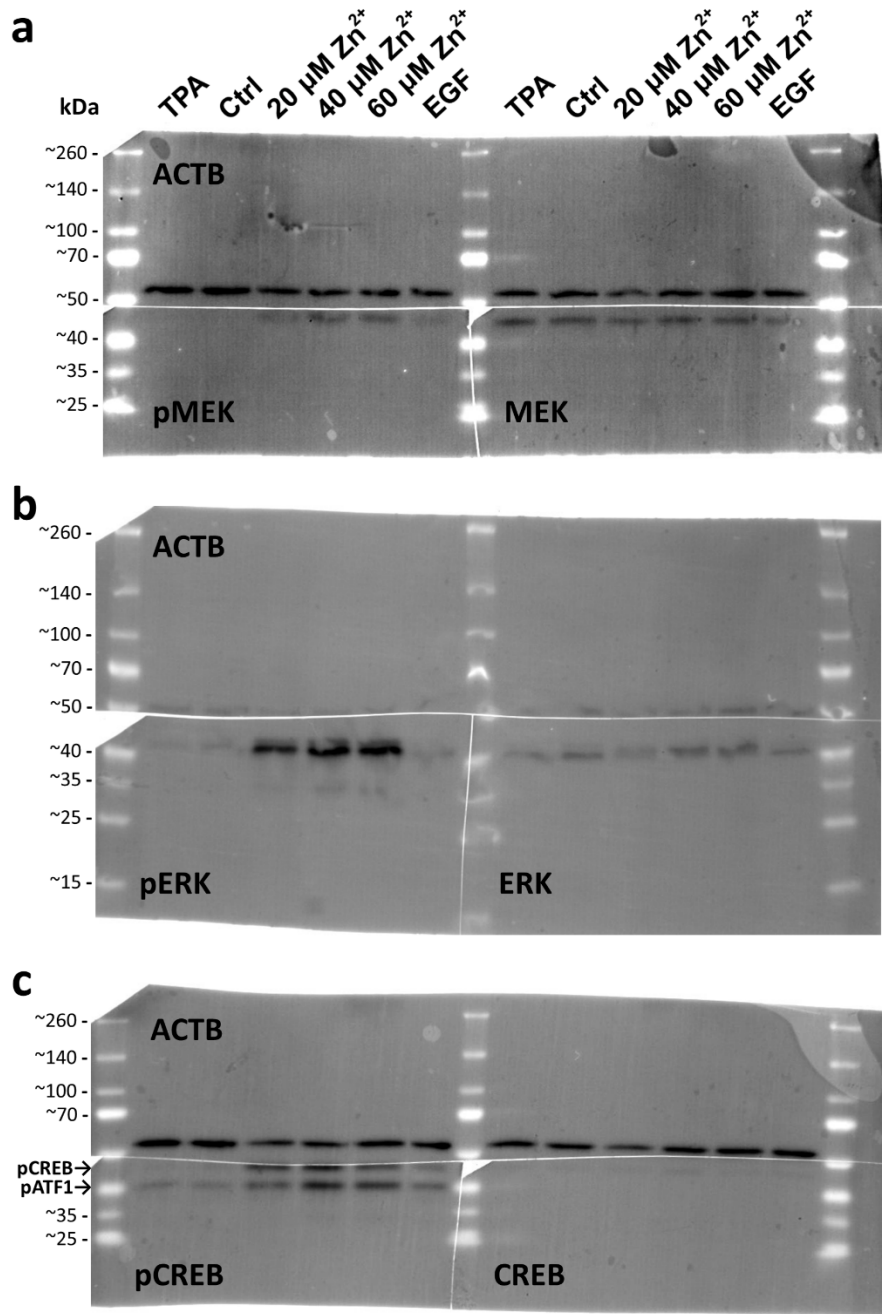

**Supplemental Figure S4:** Western blots for total and phosphorylated protein of (a) MEK, (b) ERK, and (c) CREB from Figure 3b. Full blot, with  $\beta$ -actin (ACTB) loading control. Protein was loaded in volumes controlled by BCA assay, and membrane was cut (indicated by white space) to incubate different regions of the membrane with different antibodies. Luminescence images were overlaid with digital images to highlight separation between antibodies and show protein ladder using average intensity z projection. Phospho-ATF1 band is labeled as indicated by the manufacturer.

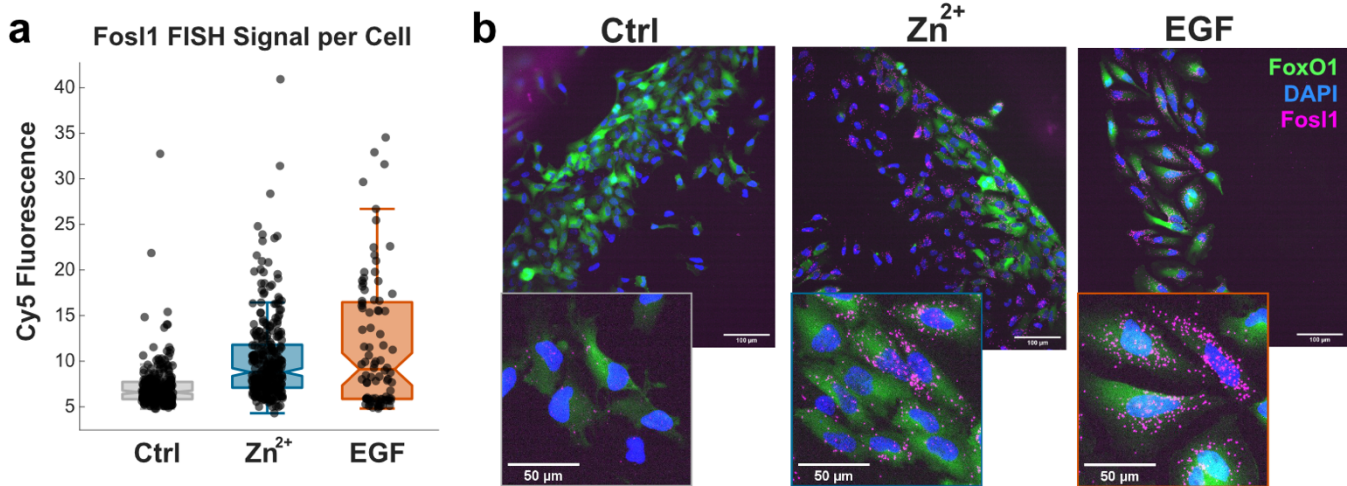

**Supplemental Fig S5:** RNA FISH against Fos1 (also called FRA1) reveals that EGF and Zn<sup>2+</sup> each increase expression of Fos1 compared to control. (a) Quantification of Cy5 fluorescence in a 4-pixel ring around the nuclear mask. Each dot represents an individual cell. (b) Representative images showing FoxO1 signal (green), DAPI DNA stain (blue) and Fos1 mRNA (magenta). Scale bar = 100 μm. Inset shows zoomed image for detail. Statistical analysis was carried out by a one-way ANOVA which showed that the difference in Zn<sup>2+</sup> and EGF compared to Ctrl was significant with a  $p < 0.0001$ . Scale bar = 50 μm.

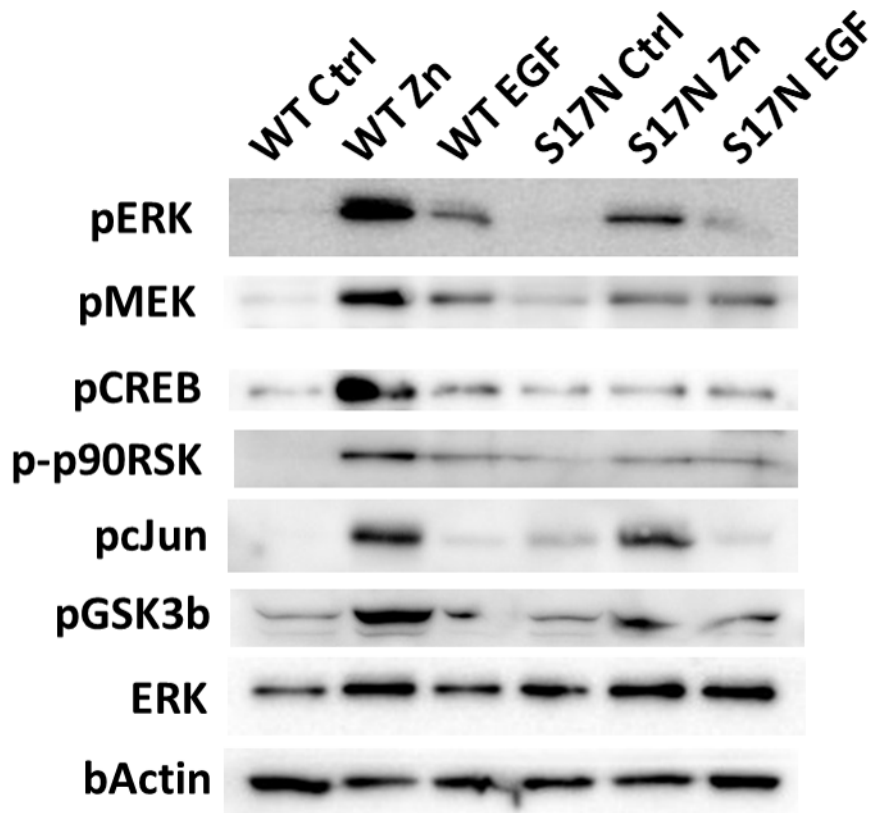

**Supplemental Fig S6:** Western blot results for key proteins in the MAPK or Akt signaling pathways, where “p” indicates detection of the phosphorylated state of the protein. MEK is upstream of ERK. CREB, p90RSK, c-Jun are downstream of ERK. GSK3 $\beta$  is downstream of Akt. Beta-Actin and total ERK are used as loading controls. HeLa cells were treated with Ctrl (media change), 40  $\mu$ M Zn<sup>2+</sup>, or 20 nM EGF. The dominant negative EGFP-HRas-S17N was transiently transfected 48 hours prior to treatment. Because the transfection was variable, a complete block of Zn<sup>2+</sup>- or EGF-induced activation was not observed in the S17N samples, although a decrease in the amount of phosphorylated protein was consistently observed. Each image represents the protein band of interest from different membranes that were incubated with the antibodies indicated. Full gel membranes are shown in Supplementary Figure S7. Details regarding the antibodies used are provided in the Resources Table.

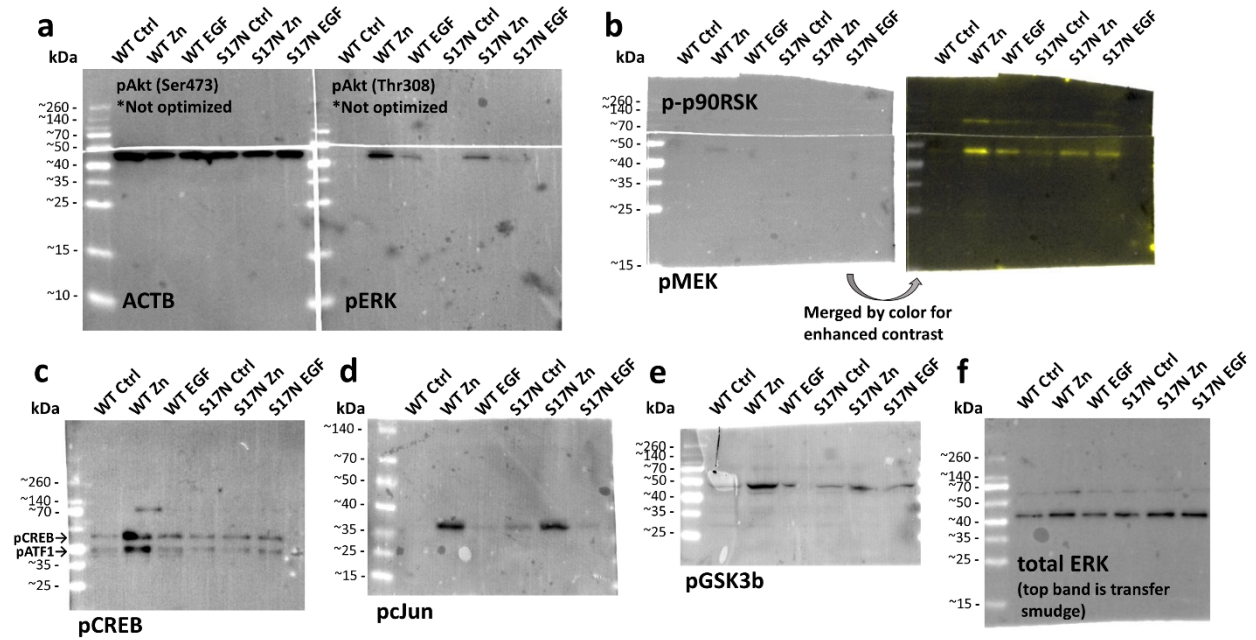

**Supplemental Figure S7:** Luminescence full-gel images from Supp Fig S6 western blots were overlaid with digital images to show full gel with protein ladder and any cuts used to test multiple antibodies on the same gel. Results are shown using protein from a single biological replicate. (a) ACTB loading control and phospho-ERK blots, along with two phospho-Akt antibodies that were not optimized at the time of the experiment. (b) phospho-p90RSK (S380) and phospho-MEK antibodies were both low-contrast compared to the digital image, so a color overlay where luminescence is shown in yellow is used to highlight the antibody bands. Antibodies for downstream targets of ERK and Akt (c) phospho-CREB and phospho-ATF1, annotated as indicated by the manufacturer, (d) phospho-cJun, and (e) phospho-GSK3 $\beta$ . (f) Total ERK control was bumped slightly during transfer.



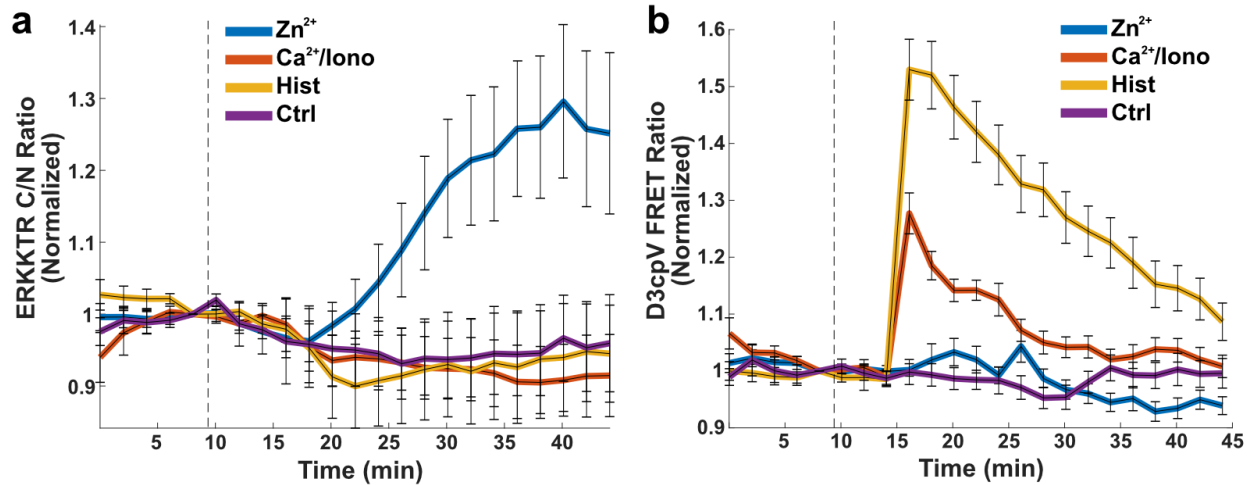

**Supplemental Fig S8:** Zn<sup>2+</sup> and calcium are independent within our system of Zn<sup>2+</sup> activation. Cells with an ERK-KTR translocation sensor (a), and D3cpV FRET calcium sensor (b) were imaged with addition of 40  $\mu$ M Zn<sup>2+</sup>, 10 mM calcium + 5  $\mu$ M ionomycin, or 100  $\mu$ M histamine just before 10 minutes. Zn<sup>2+</sup>, but not treatments that elevate cytosolic Ca<sup>2+</sup> (Ca<sup>2+</sup>/ionomycin and Histamine), increase ERK activity. Conversely, Ca<sup>2+</sup>/ionomycin and Histamine increase cytosolic Ca<sup>2+</sup> while Zn<sup>2+</sup> does not. The normalized mean and SD from at least 23 cells are plotted against time.

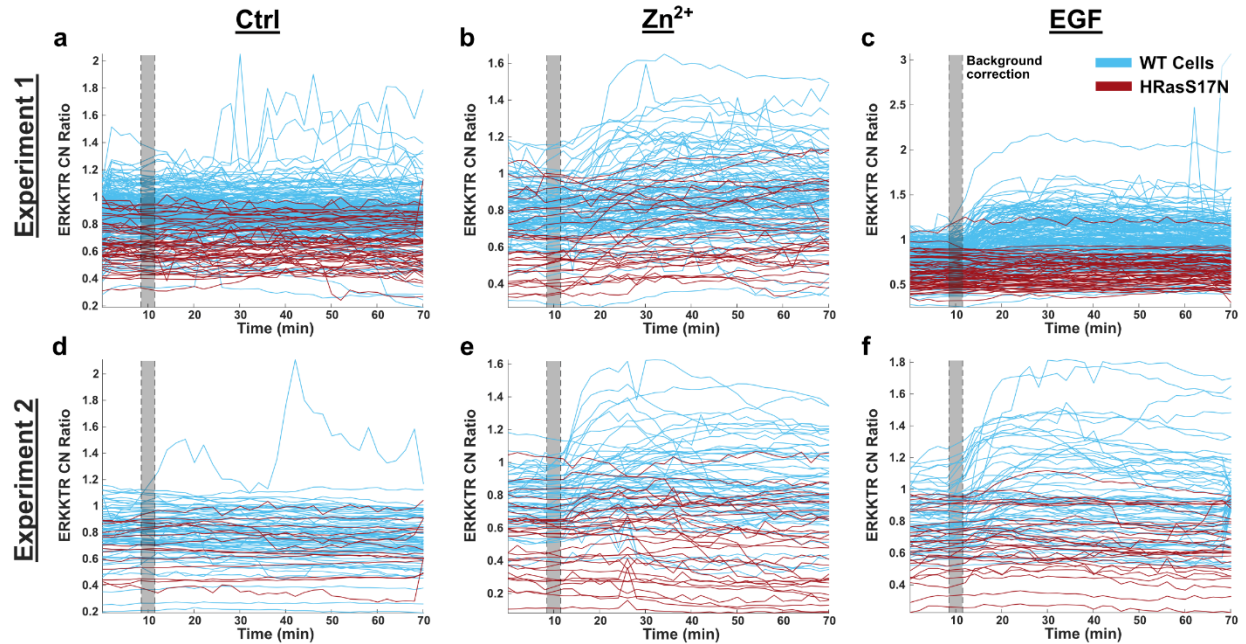

**Supplemental Fig S9:** Single cell traces of ERK activation in cells with the RasS17N mutation. A-C) Single cell traces from Fig 6e, showing very low ERK response to both Zn<sup>2+</sup> and EGF in cells containing the dominant negative RasS17N mutation. D-F) Single cell traces from a similar experiment conducted on a separate day.

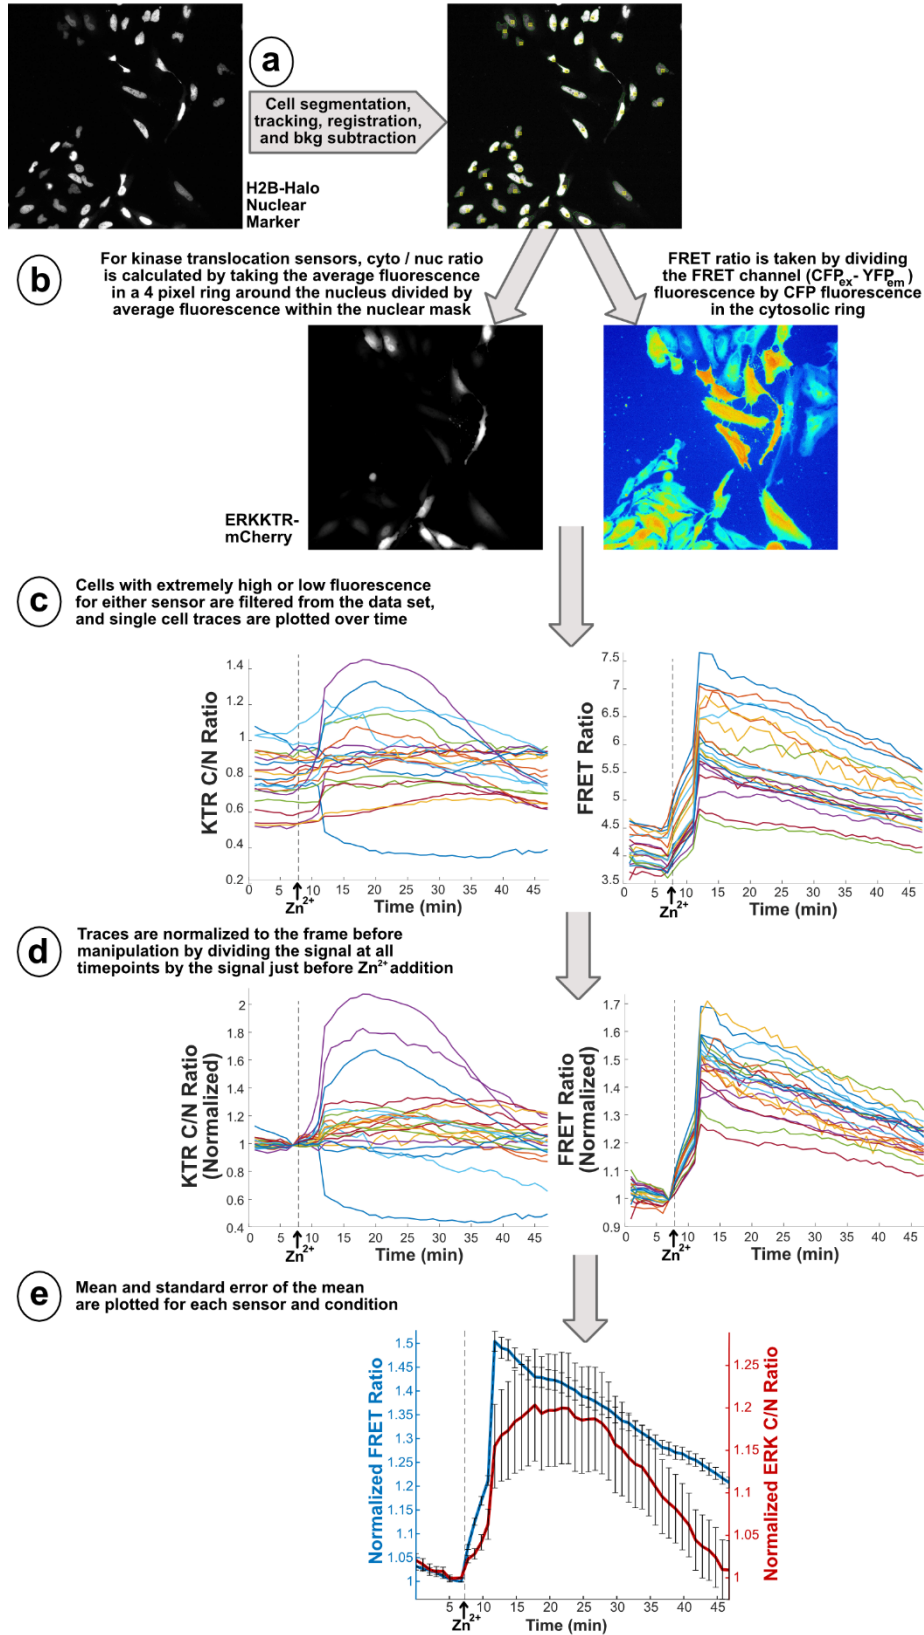

**Supplemental Figure S10:** Diagram of ZapCV2 FRET and ERKKTR image processing pipeline. The Nikon ND2 file is imported into MATLAB. (a) Cells are segmented by nuclear marker in either Cy5 (H2B-Halo + JF646, this image) or BFP (Hoechst nuclear dye) channels, using the watershed method to generate nuclear masks. Frames are registered automatically anytime the experiment is paused to account for small shifts when media is manipulated. Nuclei are tracked between frames with adjustable link distance set at 100 pixels and all channels are subjected to local background subtraction. (b) To differentiate between cytosol and nucleus, the nuclear mask was dilated 4 pixels and this region was termed “cytosol”. The cytosol ring size was chosen to maintain separation between small or densely packed cells while enabling robust signal measurement. For translocation sensors, average intensity in the nucleus and cytosol of each cell is measured. For FRET sensors, average intensity in the cytosol for the acceptor channel (CFP ex, YFP em) is divided by average intensity in the donor channel (CFP) to get a FRET ratio. YFP fluorescence is also tracked over time to monitor photobleaching. (c) Using fluorescence cutoffs, cells that have very low or high sensor fluorescence were omitted from analysis. Cells that lose tracking or die during the experiment are also omitted. Ratio data for each cell is then plotted over time. (d) The ratio at each timepoint is then divided by the ratio at the frame immediately before  $Zn^{2+}$  addition to normalize the data. (e) Mean and standard error of the mean are taken for each sensor and plotted over time.

**Supplemental Table S1: Zn<sup>2+</sup> Curve Fitting:  $y = a * e^{(-b*x)} + c$** 

| Sensor | [Zn <sup>2+</sup> ]<br>added | a      | b     | c     | Sum of squares<br>due to error | Adjusted<br>R-square | Root mean<br>squared error |
|--------|------------------------------|--------|-------|-------|--------------------------------|----------------------|----------------------------|
| ZapCV2 | 10 $\mu$ M                   | -2.589 | 0.091 | 6.807 | 0.0117                         | 0.9983               | 0.0300                     |
|        | 20 $\mu$ M                   | -2.897 | 0.119 | 6.769 | 0.0030                         | 0.9997               | 0.0153                     |
|        | 40 $\mu$ M                   | -3.384 | 0.213 | 7.430 | 0.0706                         | 0.9940               | 0.0737                     |
| ZapCV5 | 10 $\mu$ M                   | -0.475 | 0.125 | 3.604 | 0.0028                         | 0.9892               | 0.0146                     |
|        | 20 $\mu$ M                   | -0.737 | 0.094 | 3.836 | 0.0004                         | 0.9994               | 0.0058                     |
|        | 40 $\mu$ M                   | -0.757 | 0.122 | 4.077 | 0.0033                         | 0.9949               | 0.0159                     |

**Supplemental Table S2: Kinase Array Raw Data**

| Kinase        | Phospho-site         | Fluorescence signal |        |        |        | Log <sub>2</sub> fold change | Negative log <sub>2</sub> p-value |
|---------------|----------------------|---------------------|--------|--------|--------|------------------------------|-----------------------------------|
|               |                      | Ctrl-1              | Ctrl-2 | Zinc-1 | Zinc-2 |                              |                                   |
| ERK1/2        | T202/Y204, T185/Y187 | 5.37                | 8.25   | 42.30  | 46.51  | 2.70                         | 7.47                              |
| CREB          | S133                 | 4.69                | 4.53   | 14.97  | 14.58  | 1.68                         | 8.09                              |
| Akt1/2/3      | S473                 | 4.19                | 3.48   | 14.58  | 9.63   | 1.66                         | 3.65                              |
| WNK1          | T60                  | 5.20                | 4.68   | 16.44  | 12.15  | 1.53                         | 3.98                              |
| HSP27         | S78/S82              | 4.11                | 3.34   | 11.05  | 7.95   | 1.35                         | 3.98                              |
| GSK-3a/b      | S21/S9               | 22.16               | 23.74  | 49.17  | 44.13  | 1.02                         | 4.50                              |
| PRAS40        | T246                 | 5.57                | 4.81   | 11.96  | 7.73   | 0.92                         | 3.14                              |
| STAT3         | Y705                 | 1.40                | 1.08   | 1.75   | 1.54   | 0.41                         | 4.52                              |
| JNK1/2/3      | T183/Y185, T221/Y223 | 10.21               | 8.36   | 12.37  | 11.03  | 0.33                         | 4.93                              |
| p38a          | T180/Y182            | 3.85                | 3.41   | 4.92   | 3.81   | 0.27                         | 2.89                              |
| MSK1/2        | S376/S360            | 10.81               | 10.47  | 11.88  | 12.76  | 0.21                         | 3.17                              |
| p70 S6 Kinase | T389                 | 2.68                | 1.52   | 2.73   | 1.93   | 0.15                         | 2.23                              |
| c-Jun         | S63                  | 3.73                | 2.27   | 3.46   | 2.76   | 0.05                         | 1.29                              |
| STAT5a/b      | Y694/Y699            | 4.84                | 4.55   | 4.19   | 4.90   | -0.05                        | 1.29                              |
| Yes           | Y426                 | 6.48                | 4.84   | 5.83   | 5.10   | -0.05                        | 1.44                              |
| Chk-2         | T68                  | 5.77                | 4.93   | 5.36   | 4.56   | -0.11                        | 5.72                              |
| EGF R         | Y1086                | 4.12                | 3.23   | 3.65   | 3.11   | -0.12                        | 2.60                              |
| STAT5b        | Y699                 | 4.38                | 3.30   | 3.21   | 3.70   | -0.15                        | 1.50                              |
| PDGF Rb       | Y751                 | 3.49                | 2.99   | 2.81   | 3.00   | -0.16                        | 1.97                              |
| Hck           | Y411                 | 5.06                | 4.45   | 4.22   | 4.30   | -0.16                        | 2.38                              |
| FAK           | Y397                 | 7.64                | 5.64   | 5.63   | 6.08   | -0.18                        | 1.65                              |
| HSP60         | --                   | 23.27               | 18.35  | 17.30  | 18.75  | -0.21                        | 1.88                              |
| Src           | Y419                 | 6.47                | 4.50   | 4.70   | 4.75   | -0.22                        | 1.76                              |
| Fyn           | Y420                 | 2.59                | 1.25   | 1.49   | 1.77   | -0.23                        | 1.35                              |
| STAT6         | Y641                 | 5.85                | 4.72   | 4.07   | 4.66   | -0.28                        | 2.06                              |
| STAT5a        | Y694                 | 3.37                | 2.03   | 2.13   | 2.32   | -0.28                        | 1.63                              |
| p27           | T198                 | 1.64                | 0.60   | 1.00   | 0.77   | -0.34                        | 1.58                              |
| AMPKa1        | T183                 | 4.59                | 3.40   | 3.35   | 2.96   | -0.34                        | 2.82                              |
| mTOR          | S2448                | 7.09                | 5.91   | 5.00   | 5.19   | -0.35                        | 2.80                              |
| AMPKa2        | T172                 | 8.97                | 6.98   | 5.87   | 6.23   | -0.40                        | 2.52                              |
| STAT2         | Y689                 | 9.80                | 7.54   | 6.76   | 6.37   | -0.40                        | 2.91                              |
| b-Catenin     | --                   | 3.73                | 2.66   | 2.20   | 2.49   | -0.45                        | 2.22                              |
| RSK1/2/3      | S380/S386/S377       | 3.03                | 1.80   | 1.86   | 1.64   | -0.46                        | 2.27                              |
| p70 S6 Kinase | T421/S424            | 3.64                | 2.30   | 2.37   | 1.88   | -0.48                        | 2.75                              |
| PYK2          | Y402                 | 2.73                | 2.10   | 1.92   | 1.52   | -0.49                        | 4.23                              |
| Lyn           | Y397                 | 2.92                | 1.86   | 1.71   | 1.57   | -0.54                        | 2.51                              |
| Fgr           | Y412                 | 1.78                | 0.79   | 0.78   | 0.94   | -0.57                        | 1.74                              |
| STAT3         | S727                 | 2.84                | 1.60   | 1.52   | 1.21   | -0.70                        | 2.67                              |
| Akt1/2/3      | T308                 | 3.94                | 2.50   | 2.02   | 1.83   | -0.74                        | 2.81                              |

|        |       |      |      |      |      |       |      |
|--------|-------|------|------|------|------|-------|------|
| Lck    | Y394  | 1.80 | 0.95 | 0.79 | 0.80 | -0.79 | 2.30 |
| eNOS   | S1177 | 2.75 | 1.62 | 1.30 | 1.22 | -0.79 | 2.59 |
| p53    | S392  | 4.72 | 3.37 | 2.45 | 2.19 | -0.80 | 3.36 |
| p53    | S46   | 3.25 | 1.84 | 1.50 | 1.36 | -0.83 | 2.60 |
| p53    | S15   | 2.40 | 1.14 | 1.08 | 0.87 | -0.86 | 2.43 |
| PLC-g1 | Y783  | 2.73 | 1.35 | 1.20 | 0.95 | -0.92 | 2.56 |

\*Fold change was taken by averaging the replicates for each condition and dividing the Zn<sup>2+</sup> added condition by control

\*\* p-value was the result of a one-tailed t test. Green boxes indicate p > 0.05.

\*\*\* To visualize differences in signal, the fluorescence signal for each replicate was shaded from white (0) to deep orange (50).

### Supplemental Table S3: Making Buffered Zn<sup>2+</sup>

| Chelator | Competing Cation | Buffered Zinc Concentrations    |                 |                 |          |                 |                 |                 |                 |                 |                 |
|----------|------------------|---------------------------------|-----------------|-----------------|----------|-----------------|-----------------|-----------------|-----------------|-----------------|-----------------|
|          |                  | Total Zn <sup>2+</sup> (mM)     | 0.1             | 0.2             | 0.3      | 0.4             | 0.5             | 0.6             | 0.7             | 0.8             | 0.9             |
| NTA      | none             | Total Zn <sup>2+</sup> (mM)     | 0.1             | 0.2             | 0.3      | 0.4             | 0.5             | 0.6             | 0.7             | 0.8             | 0.9             |
|          |                  | Accessible Zn <sup>2+</sup> (M) | <b>6.27E-10</b> | <b>1.41E-09</b> | 2.42E-09 | 3.76E-09        | <b>5.64E-09</b> | 8.47E-09        | <b>1.32E-08</b> | 2.26E-08        | 5.08E-08        |
| EGTA     | Sr <sup>2+</sup> | Total Zn <sup>2+</sup> (mM)     | 0.1             | 0.2             | 0.3      | 0.4             | 0.5             | 0.6             | 0.7             | 0.8             | 0.9             |
|          |                  | Accessible Zn <sup>2+</sup> (M) | 7.71E-09        | 1.89E-08        | 3.51E-08 | <b>5.89E-08</b> | 9.46E-08        | <b>1.51E-07</b> | 2.5E-07         | <b>4.53E-07</b> | <b>1.07E-06</b> |
| EGTA     | Ca <sup>2+</sup> | Total Zn <sup>2+</sup> (mM)     | 0.1             | 0.2             | 0.3      | 0.4             | 0.5             | 0.6             | 0.7             | 0.8             | 0.9             |
|          |                  | Accessible Zn <sup>2+</sup> (M) | 2.22E-06        | <b>5.38E-06</b> | 9.82E-06 | <b>1.61E-05</b> | 2.49E-05        | <b>3.74E-05</b> | 5.55E-05        | <b>8.16E-05</b> | <b>1.19E-04</b> |

\* Bolded concentrations were used in buffered zinc MKP3 inhibition experiment

\*\* Italicized concentration was used in Zn<sup>2+</sup> sensor calibration experiments

| Log K <sub>(ZnChelator)</sub> |       | Log K <sub>(SrChelator)</sub> |     | Log K <sub>(CaChelator)</sub> |       |
|-------------------------------|-------|-------------------------------|-----|-------------------------------|-------|
| EGTA                          | 12.7  | EGTA                          | 8.5 | EGTA                          | 10.97 |
| NTA                           | 10.67 |                               |     |                               |       |

|                  | NTA  | EGTA |
|------------------|------|------|
| pKa <sub>1</sub> | 9.71 | 9.47 |
| pKa <sub>2</sub> |      | 8.85 |

### Captions for Supplemental Movies

#### Supplementary Movie S1&2:

Companion to Figure 2. Simultaneous imaging of Zn<sup>2+</sup> and ERK activity demonstrates that in individual HeLa cells Zn<sup>2+</sup> increase precedes the increase in ERK activity. 1) Individual cells expressing ERKKTR-mCherry, imaged over 70 minutes. 2) Individual cells expressing NES-ZapCV2 pseudo-colored by FRET Ratio where warmer colors indicate higher FRET, imaged over 70 minutes.

#### Supplementary Movie S3&4:

Companion to Figure 4. Zn<sup>2+</sup> activates both ERK and Akt in a concentration-dependent manner. 3) Individual cells expressing ERKKTR-mCherry, imaged over 70 minutes. 4) Individual cells expressing FoxO1-Clover Akt sensor, imaged over 70 minutes.



## Supplemental Methods

### *Adenovirus Generation*

Adenovirus plasmid cloning and viral amplification were conducted as previously described<sup>1,2</sup> with the generous help of Dr. Stephen Langers in the Lab of Professor Leslie Leinwand (University of Colorado Boulder). Briefly, primers in the Resources Table were used to amplify ERKTR-mCherry with overhangs for InFusion cloning into the pShuttle plasmid, which was then cut with Pme1 restriction enzyme and transformed into BJ5183 (RecA+, pAdEasy-1) bacteria for homologous recombination into pAdEasy-1 plasmid. Successful clones were transformed into DH5 $\alpha$  *E. coli*, DNA was extracted using QIAGEN midi kit and digested with Pac1 to linearize. Linear DNA was extracted using phenol-chloroform and ethanol precipitation and transfected into HEK293pr cells. Virus was amplified six times in HEK293pr cells and harvested by cesium chloride gradient. Virus was added at MOI = 10 to MCF10A cells for plasmid expression.

### *RNA FISH*

Cells were imaged as above with the FoxO1-Clover sensor and Hoechst nuclear dye. Briefly, cells were incubated in HHBSS with Hoechst for 15 minutes and then further incubated for 15 min in HHBSS at 37°C and 0% CO<sub>2</sub>. FoxO1-Clover Akt sensor was measured for 10 minutes and 40  $\mu$ M ZnCl<sub>2</sub> or 20 nM EGF was added for 30 minutes. Cells were fixed following this time-course by incubation in 4% paraformaldehyde for 15 min and processed according to the manufacturer's instructions (ThermoFisher QVC0001). The Fos1 ViewRNA Type 6 probe (ThermoFisher) mRNA probe was hybridized at 40 °C for 3 hr, followed by standard amplification and fluorescent labelling steps also at 40 °C. FISH fluorescence was detected on the Nikon Ti-E with 20X 0.8 NA Plan Apo objective lens. Mean Cy5 fluorescence was detected in the 4-pixel ring around the nuclear mask.

## Supplemental References

1. He, T.-C. *et al.* A simplified system for generating recombinant adenoviruses. *Proc. Natl. Acad. Sci.* **95**, 2509–2514 (1998).
2. Sommese, R. F. *et al.* Molecular consequences of the R453C hypertrophic cardiomyopathy mutation on human -cardiac myosin motor function. *Proc. Natl. Acad. Sci.* **110**, 12607–12612 (2013).
